# Supplementary material for: Antitumor substitution-inert polynuclear platinum complexes stabilize G-quadruplex DNA and suppress G-quadruplex-mediated gene expression
Source: Royal Society of Chemistry journal article supplement (doi:10.1039/d1qi00488c), 2021-01-01
Supplement: d1qi00488c1.pdf [file d1qi00488c1.pdf]

## Supplemental information for:

# Antitumor substitution-inert polynuclear platinum complexes stabilize G-quadruplex DNA and suppress G-quadruplex-mediated gene expression

Jaroslav Malina,<sup>a</sup> Hana Kostrhunova,<sup>a</sup> Nicholas P. Farrell<sup>b</sup> and Viktor Brabec<sup>\*a</sup>

<sup>1</sup>Czech Academy of Sciences, Institute of Biophysics, Kralovopolska 135, CZ-61265 Brno, Czech Republic and

<sup>2</sup>Virginia Commonwealth University, Department of Chemistry, Richmond, VA 23284-2006, USA

## Table of Contents

|                                                                                                                                                                                                                                    |     |
|------------------------------------------------------------------------------------------------------------------------------------------------------------------------------------------------------------------------------------|-----|
| <b>Supplementary Figures</b>                                                                                                                                                                                                       | S3  |
| Autoradiograms of 12% denaturing PAA gels for the <i>Taq</i> DNA polymerase stop assay on the templates containing <i>c-myc</i> , <i>c-kit2</i> , and <i>hTelo</i> G4-forming sequences in the presence of <b>III-VI</b> (Fig. S1) | S3  |
| Autoradiogram of 12% denaturing PAA gel for the <i>Taq</i> DNA polymerase stop assay on the template containing <i>hTelo</i> G4-forming sequence in the presence of <b>I</b> and <b>II</b> (Fig. S2)                               | S4  |
| Autoradiograms of 12% denaturing PAA gels for the <i>Taq</i> DNA polymerase stop assay on the <i>c-myc</i> ctrl template in the presence of <b>III-VI</b> (Fig. S3)                                                                | S5  |
| Fluorescence melting curves for the fluorescent labeled <i>c-myc</i> G4 in 4 mM potassium phosphate buffer (pH7) and in the presence of 0.8 μM <b>I-VI</b> and various concentrations of competitor duplex (Fig. S4)               | S6  |
| Fluorescence melting curves for the fluorescent labeled <i>c-kit2</i> G4 in 4 mM potassium phosphate buffer (pH7) and in the presence of 0.8 μM <b>I-VI</b> and various concentrations of competitor duplex (Fig. S5)              | S7  |
| Fluorescence melting curves for the fluorescent labeled <i>hTelo</i> G4 in 4 mM potassium phosphate buffer (pH7) and in the presence of 0.8 μM <b>I-VI</b> and various concentrations of competitor duplex (Fig. S6)               | S8  |
| Fluorescence melting curves for the fluorescent labeled <i>c-myc</i> G4 in 10 mM potassium phosphate buffer (pH7) and 10 mM KCl in the presence of 0.8 μM <b>I-VI</b> and various concentrations of competitor duplex (Fig. S7)    | S9  |
| Fluorescence melting curves for the fluorescent labeled <i>c-kit2</i> G4 in 10 mM potassium phosphate buffer (pH7) and 10 mM KCl in the presence of 0.8 μM <b>I-VI</b> and various concentrations of competitor duplex (Fig. S8)   | S10 |
| Fluorescence melting curves for the fluorescent labeled <i>hTelo</i> G4 in 10 mM potassium phosphate buffer (pH7) and 10 mM KCl in the presence of 0.8 μM <b>I-VI</b> and various concentrations of competitor duplex (Fig. S9)    | S11 |
| CD spectra of <i>c-myc</i> G4 in the presence of <b>II-VI</b> (Fig. S10)                                                                                                                                                           | S12 |
|                                                                                                                                                                                                                                    | S1  |

|                                                                                                                                                             |     |
|-------------------------------------------------------------------------------------------------------------------------------------------------------------|-----|
| CD spectra of <i>c-kit2</i> G4 in the presence of <b>II-VI</b> (Fig. S11)                                                                                   | S13 |
| CD spectra of <i>hTelo</i> G4 in the presence of <b>II-VI</b> (Fig. S12)                                                                                    | S14 |
| Fluorescence response of <i>c-myc</i> G4 mixed with Hoechst 33258 or thiazole orange in the presence of increasing concentrations of <b>I-VI</b> (Fig. S13) | S15 |
| Antiproliferative effects of the investigated SI-PPCs (Table S1)                                                                                            | S15 |

## Supplementary Figures

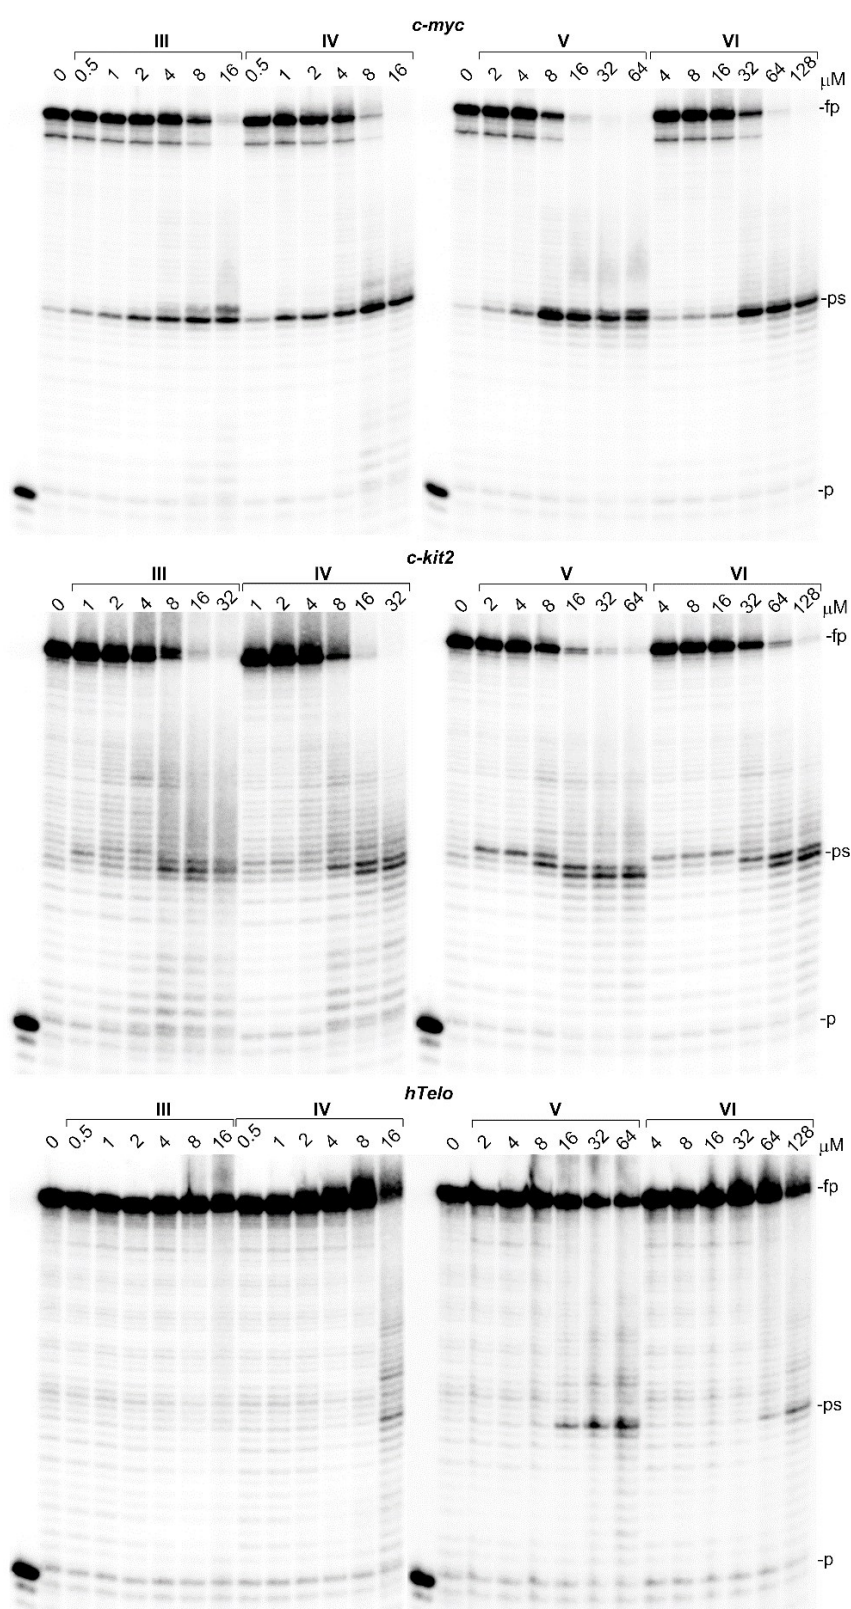

**Fig. S1.** Autoradiograms of 12% denaturing PAA gels for the *Taq* DNA polymerase stop assay on the templates containing *c-myc*, *c-kit2*, and *hTelo* G4-forming sequences in the presence of increasing concentrations of **III-VI**. *p*, *ps*, and *fp* correspond to primer, pausing site, and full-length product, respectively.

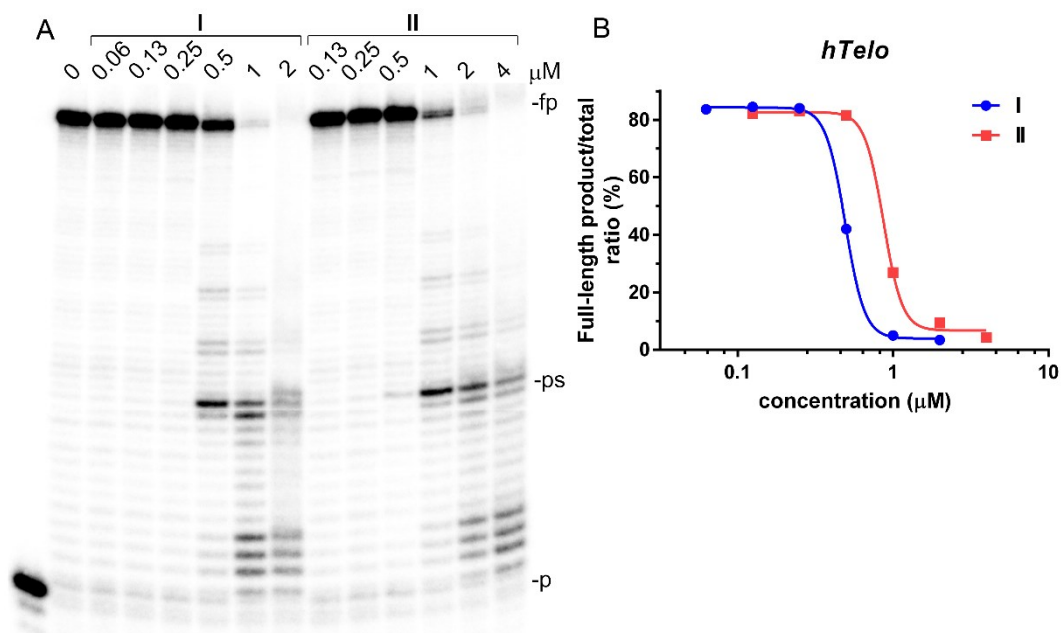

**Fig. S2.** (A) Autoradiogram of 12% denaturing PAA gel for the *Taq* DNA polymerase stop assay on the template containing *hTelo* G4-forming sequence with increasing concentrations of **I** and **II**. *p*, *ps*, and *fp* correspond to primer, pausing site, and full-length product, respectively (B) Graphical representation of the full-length product synthesis in the presence of increasing concentrations of **I** and **II**.

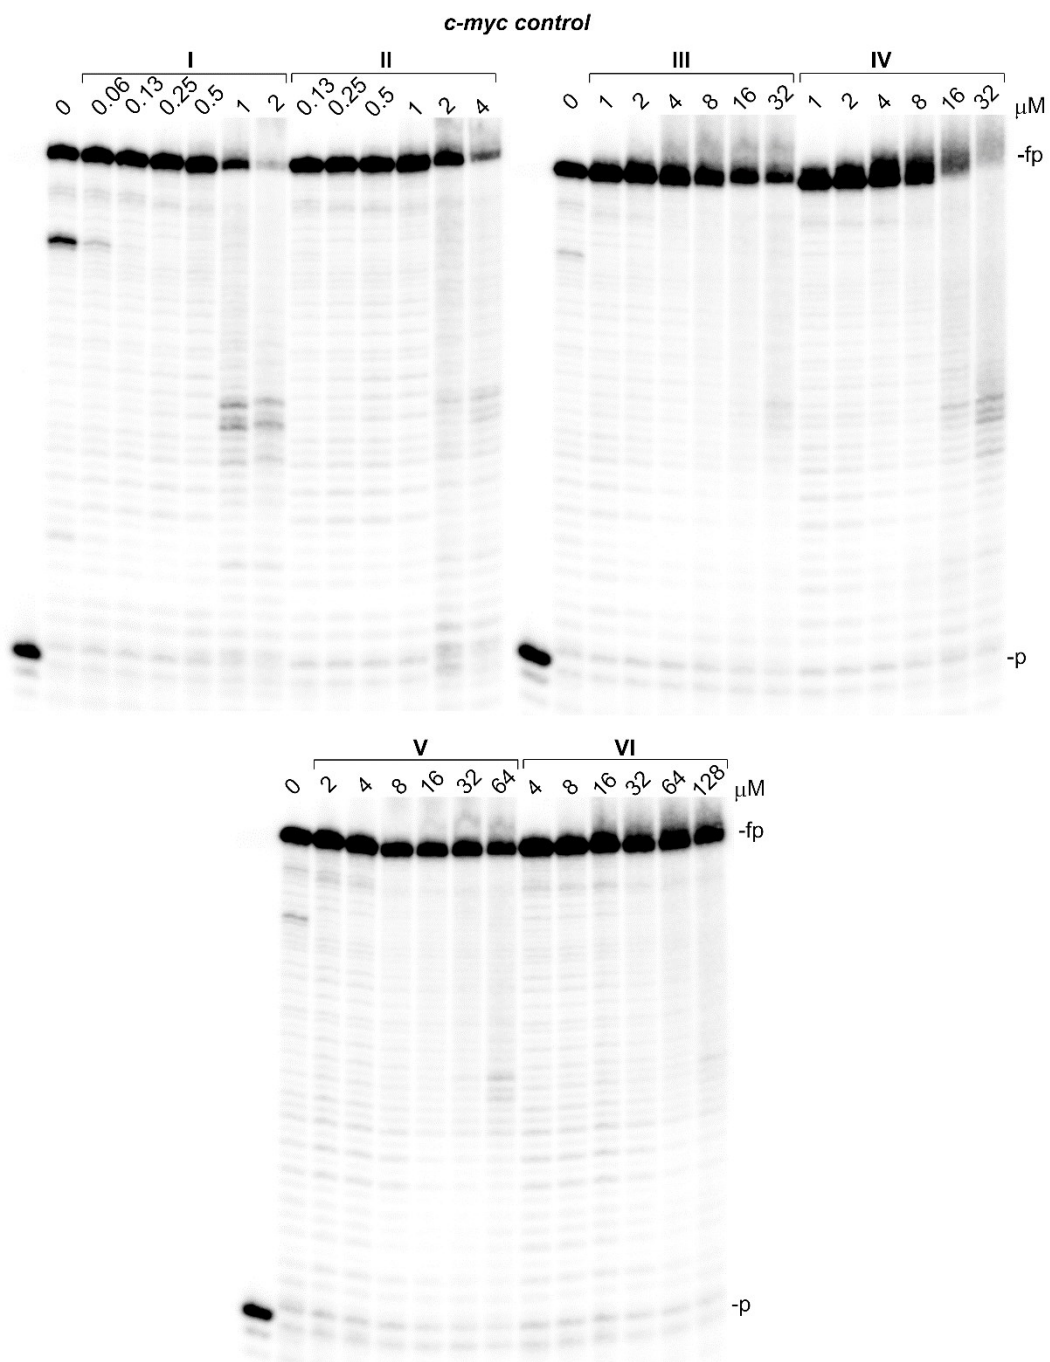

**Fig. S3.** Autoradiograms of 12% denaturing PAA gels for the *Taq* DNA polymerase stop assay on the *c-myc* ctrl template in the presence of increasing concentrations of **I-VI**. *p* and *fp* correspond to primer and full-length product, respectively.

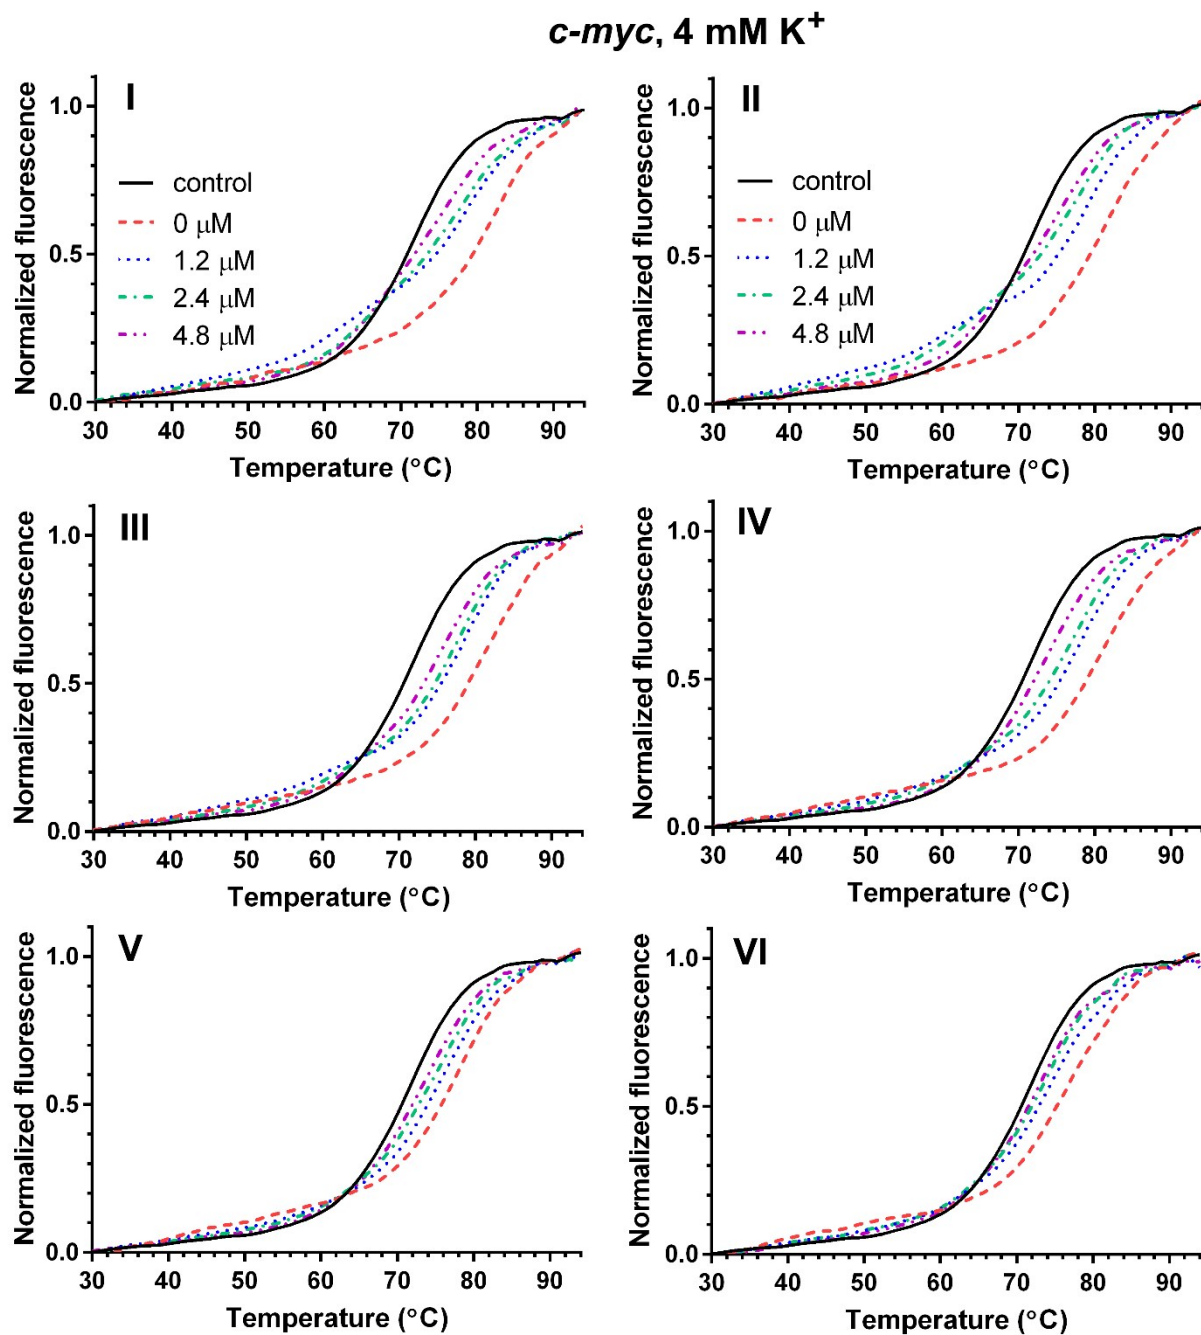

**Fig. S4.** Fluorescence melting curves for the fluorescent labeled *c-myc* G4 (0.4  $\mu\text{M}$ ) in the presence of 0.8  $\mu\text{M}$  I-VI and increasing concentrations of the competitor duplex 26-ds. The buffer conditions were 4 mM potassium phosphate (pH 7) and the temperature gradient was 0.7  $^{\circ}\text{C}/\text{min}$ . The concentrations of 26-ds are indicated in the Fig. 3.



***c-kit2*, 4 mM K<sup>+</sup>**

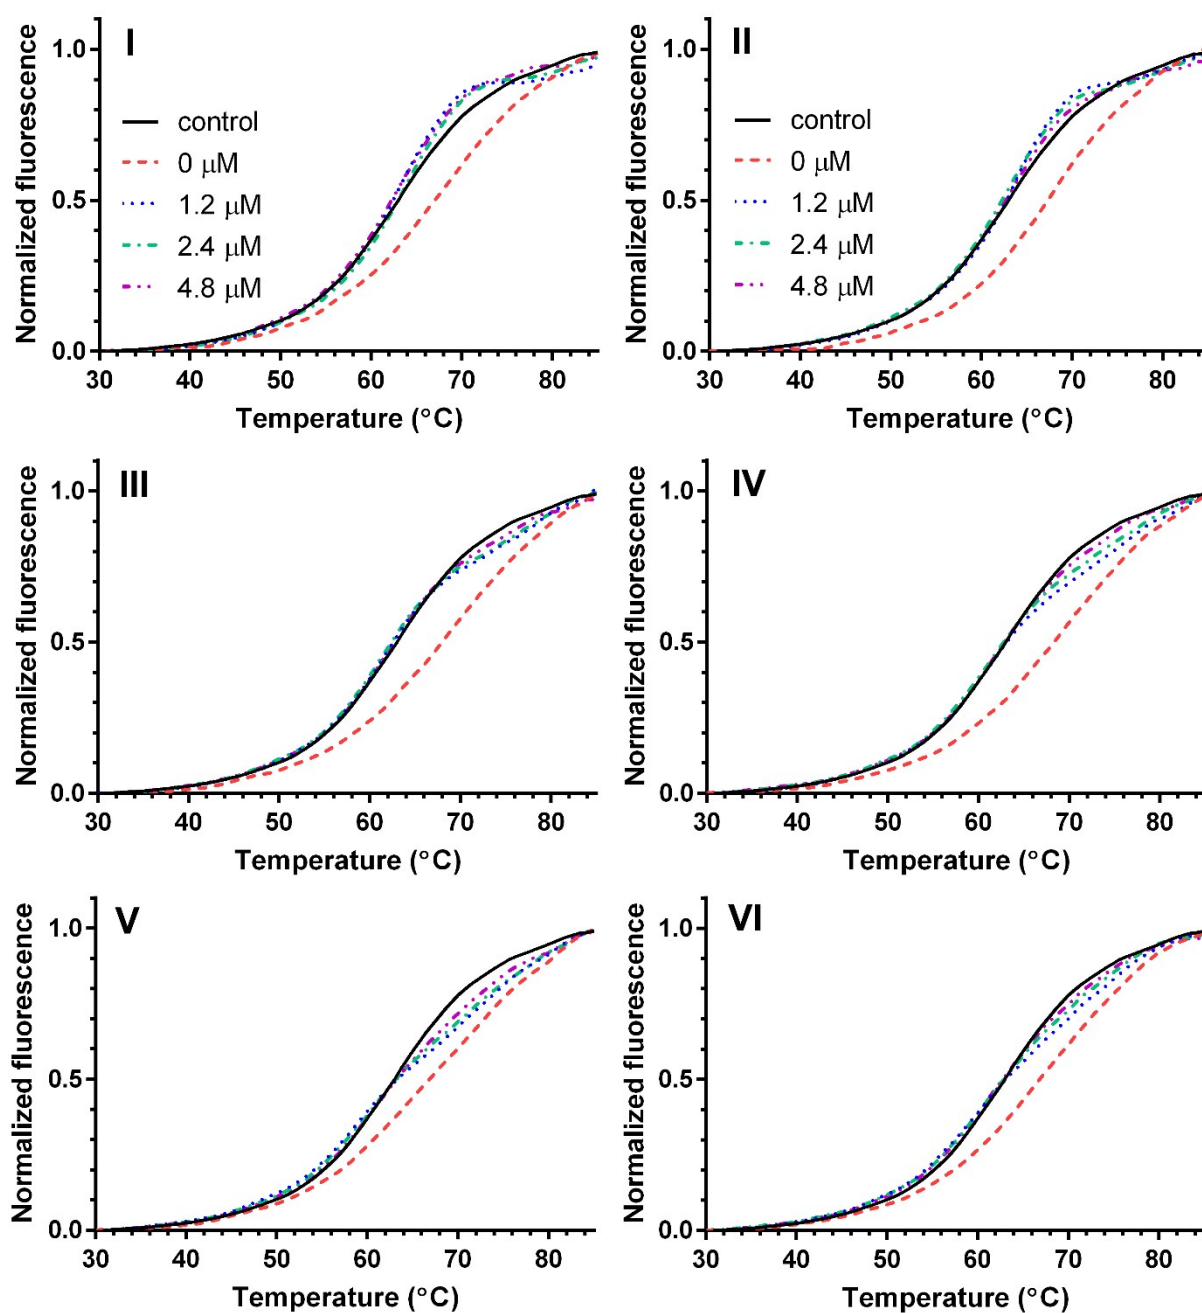

**Fig. S5.** Fluorescence melting curves for the fluorescent labeled *c-kit2* G4 (0.4 μM) in the presence of 0.8 μM **I-VI** and increasing concentrations of the competitor duplex 26-ds. The buffer conditions were 4 mM potassium phosphate (pH 7) and the temperature gradient was 0.7 °C/min. The concentrations of 26-ds are indicated in the Fig. 3.

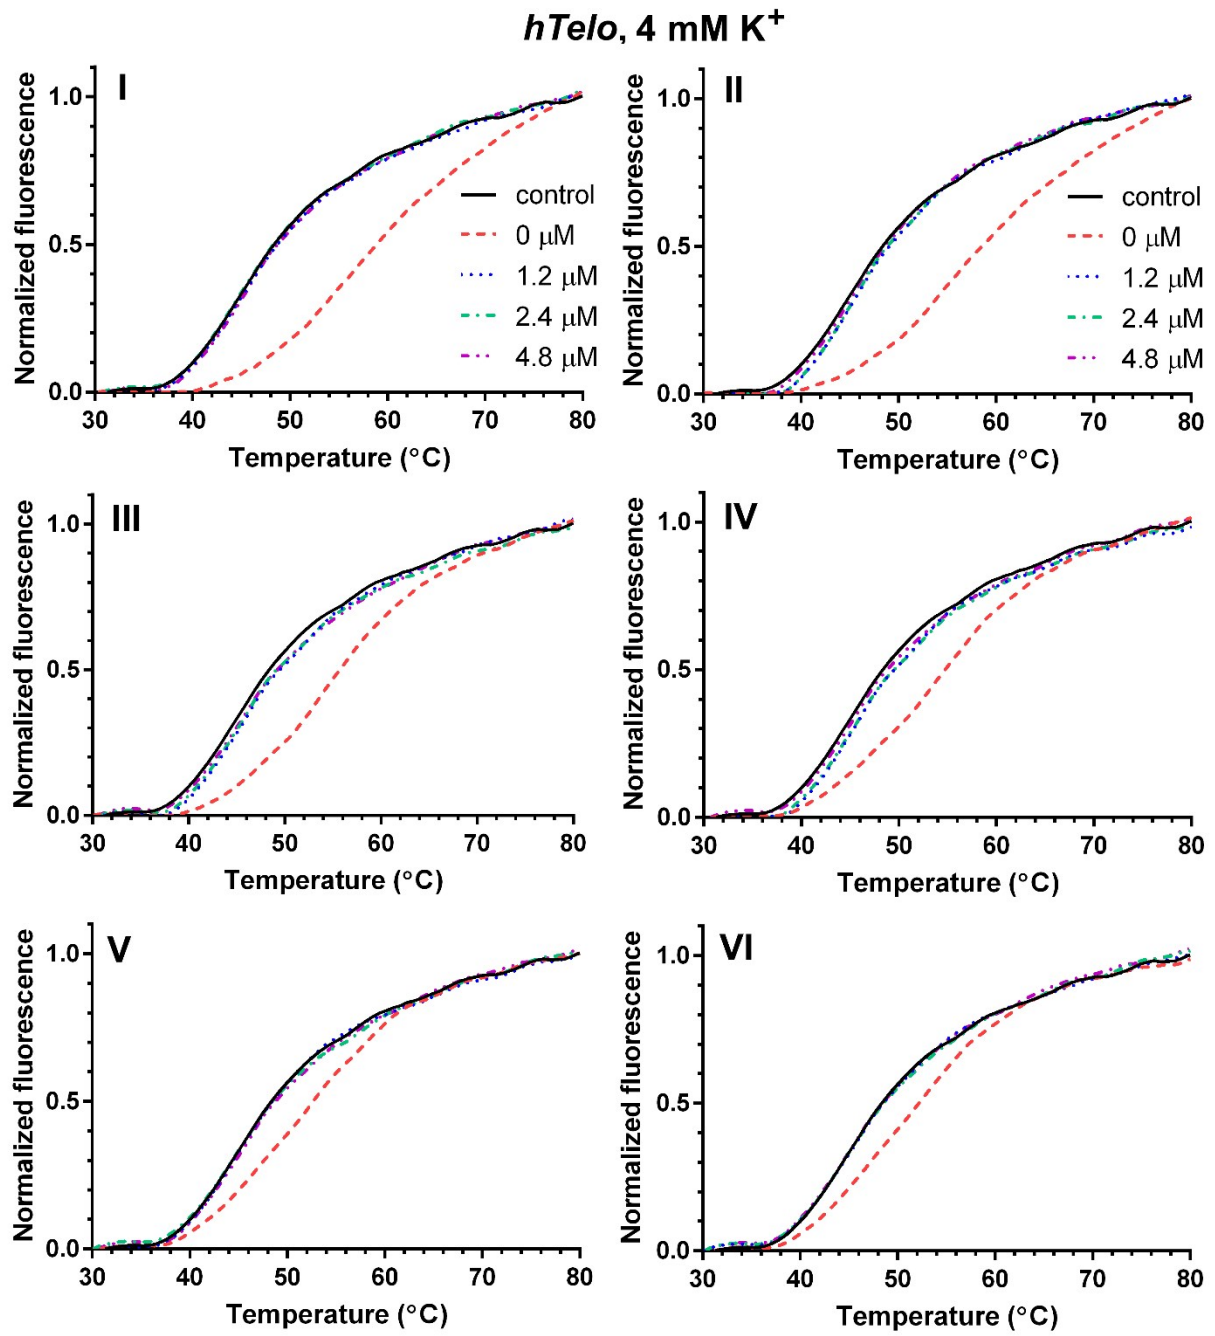

**Fig. S6.** Fluorescence melting curves for the fluorescently labeled *hTelo* G4 (0.4 μM) in the presence of 0.8 μM I-VI and increasing concentrations of the competitor duplex 26-ds. The buffer conditions were 4 mM potassium phosphate (pH 7) and the temperature gradient was 0.7 °C/min. The concentrations of 26-ds are indicated in the Fig. 3.



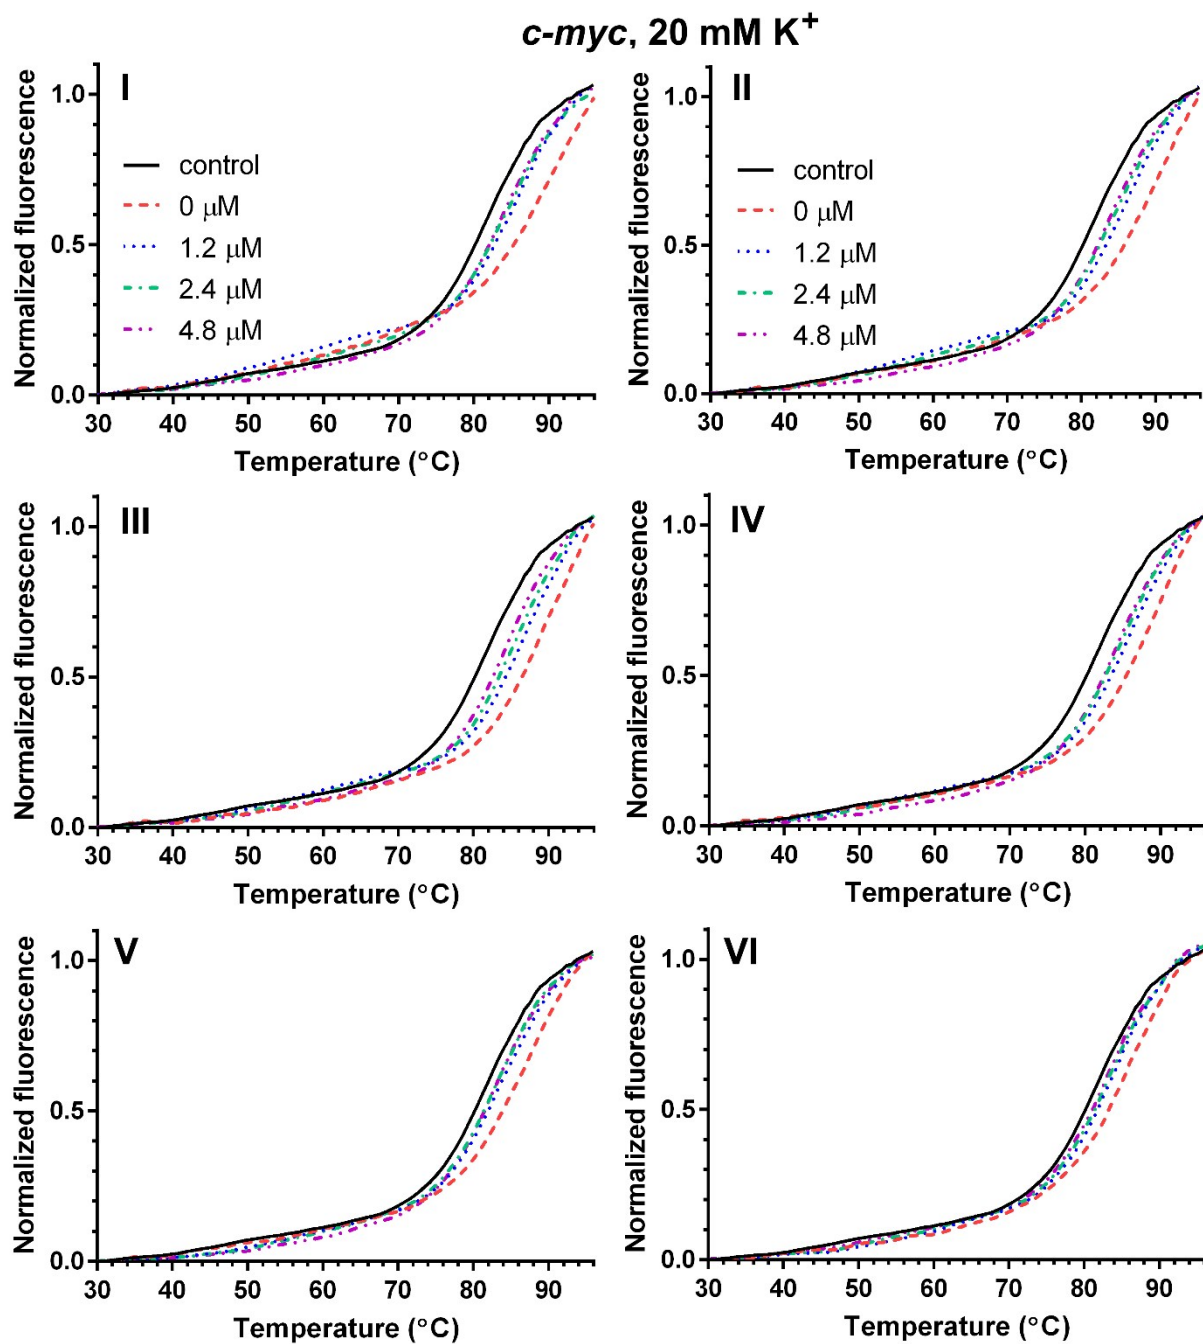

**Fig. S7.** Fluorescence melting curves for the fluorescent labeled *c-myc* G4 (0.4 μM) in the presence of 0.8 μM **I-VI** and increasing concentrations of the competitor duplex 26-ds. The buffer conditions were 10 mM potassium phosphate (pH 7) and 10 mM KCl and the temperature gradient was 0.7 °C/min. The concentrations of 26-ds are indicated in the Fig. 3.

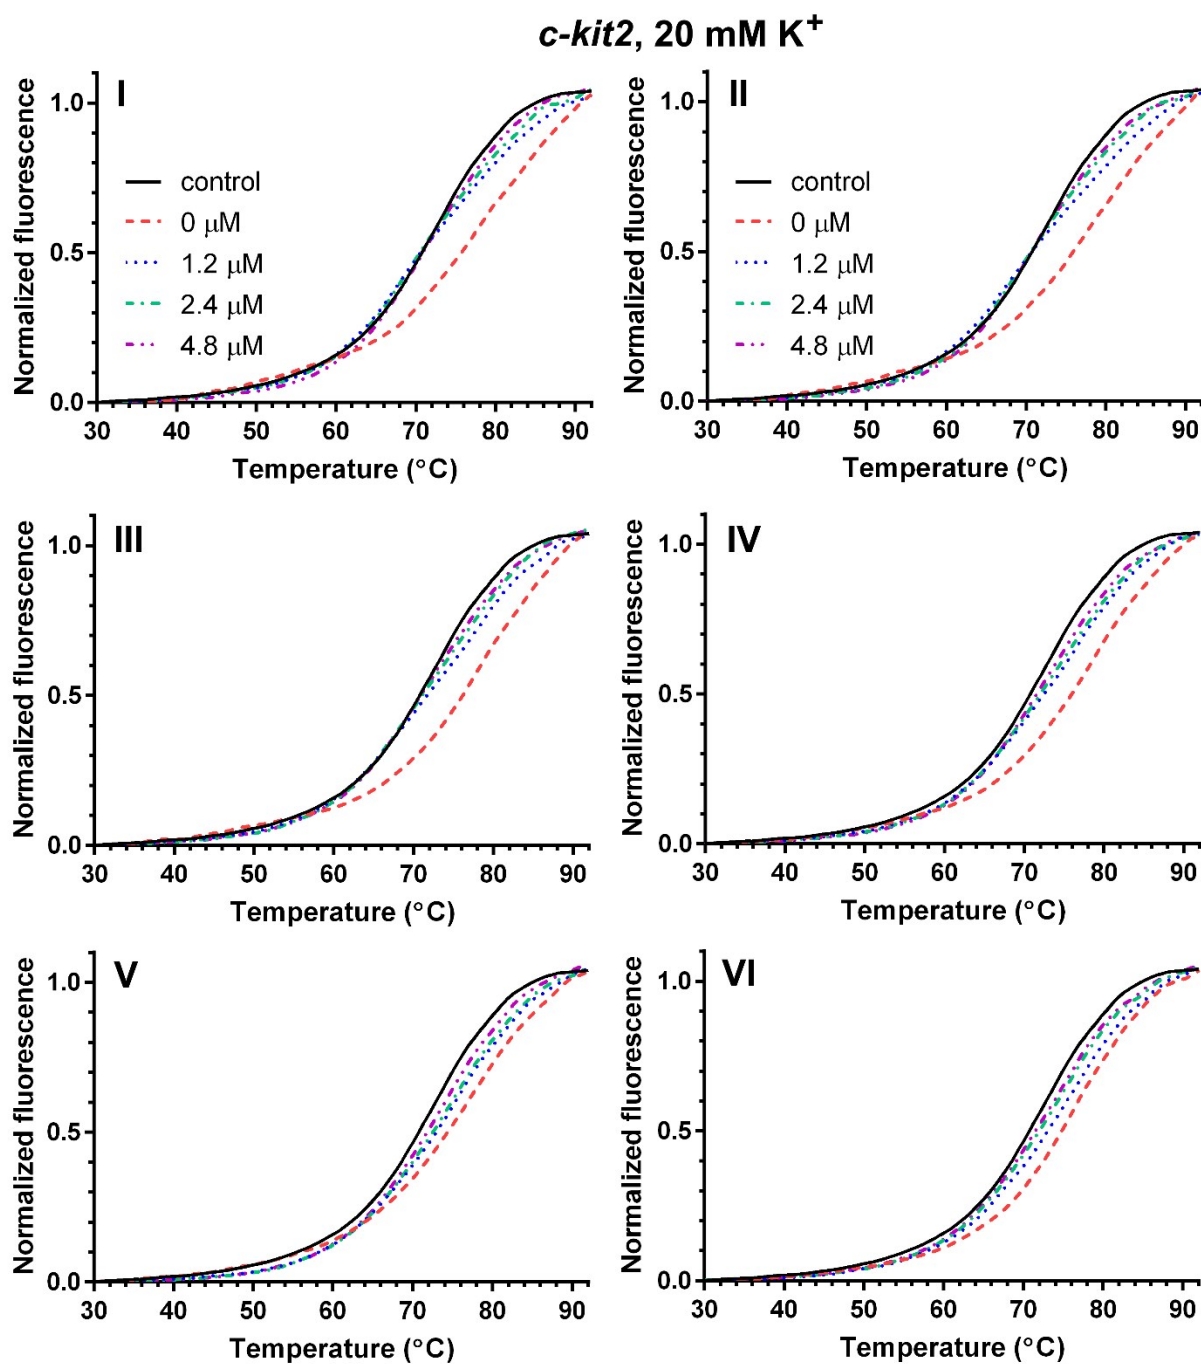

**Fig. S8.** Fluorescence melting curves for the fluorescent labeled *c-kit2* G4 (0.4  $\mu\text{M}$ ) in the presence of 0.8  $\mu\text{M}$  **I-VI** and increasing concentrations of the competitor duplex 26-ds. The buffer conditions were 10 mM potassium phosphate (pH 7) and 10 mM KCl and the temperature gradient was 0.7 °C/min. The concentrations of 26-ds are indicated in the Fig. 3.

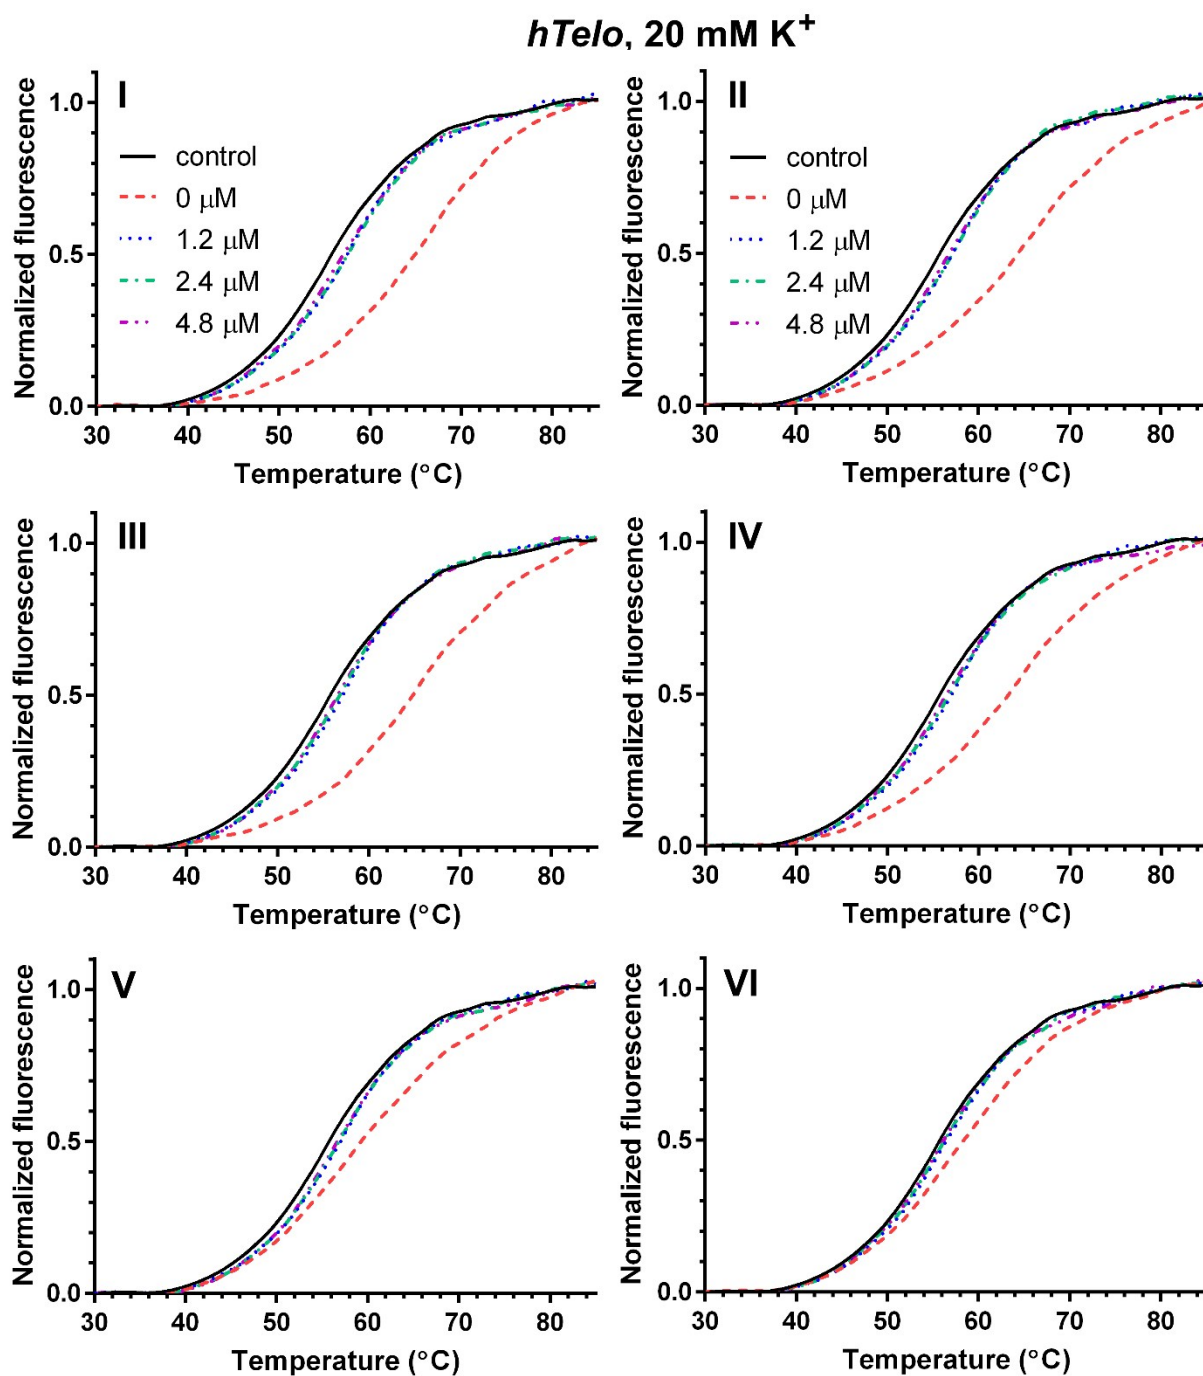

**Fig. S9.** Fluorescence melting curves for the fluorescently labeled *hTelo* G4 (0.4  $\mu\text{M}$ ) in the presence of 0.8  $\mu\text{M}$  I-VI and increasing concentrations of the competitor duplex 26-ds. The buffer conditions were 10 mM potassium phosphate (pH 7) and 10 mM KCl and the temperature gradient was 0.7  $^{\circ}\text{C}/\text{min}$ . The concentrations of 26-ds are indicated in the Fig. 3.

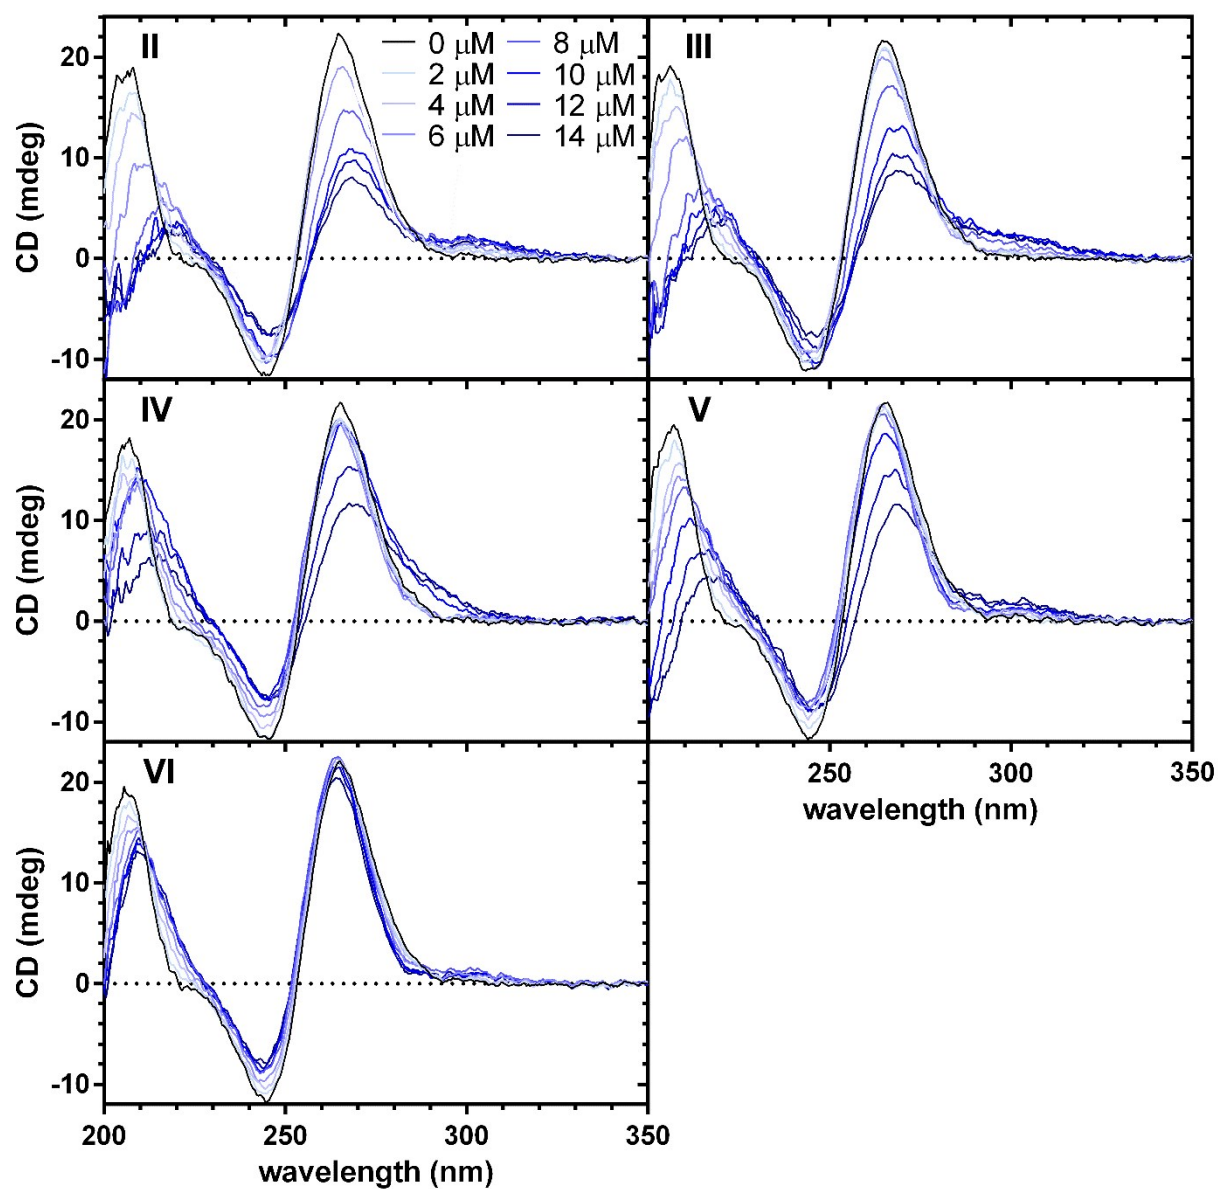

**Fig. S10.** CD spectra of 2.5  $\mu\text{M}$  *c-myc* G4 in the presence of increasing concentrations of **II-VI**. The concentrations of **II-VI** are indicated in the Fig. 4A. The buffer conditions were 10 mM potassium phosphate (pH 7) and 30 mM KCl.

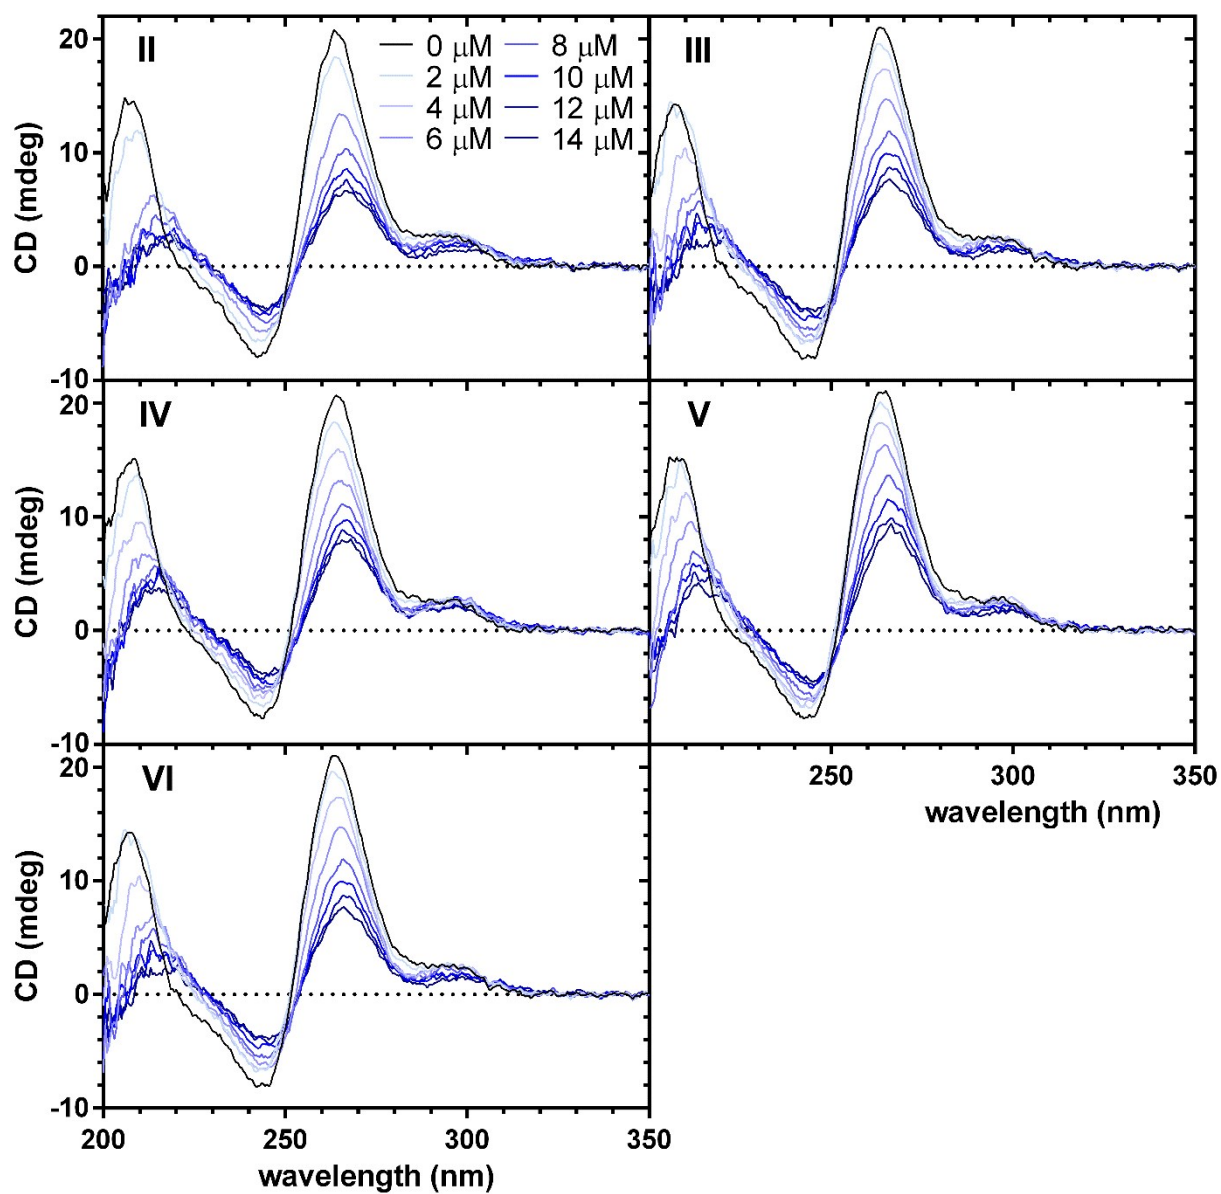

**Fig. S11.** CD spectra of 2.5  $\mu\text{M}$  *c-kit2* G4 in the presence of increasing concentrations of **II-VI**. The concentrations of **II-VI** are indicated in the Fig. 4A. The buffer conditions were 10 mM potassium phosphate (pH 7) and 30 mM KCl.

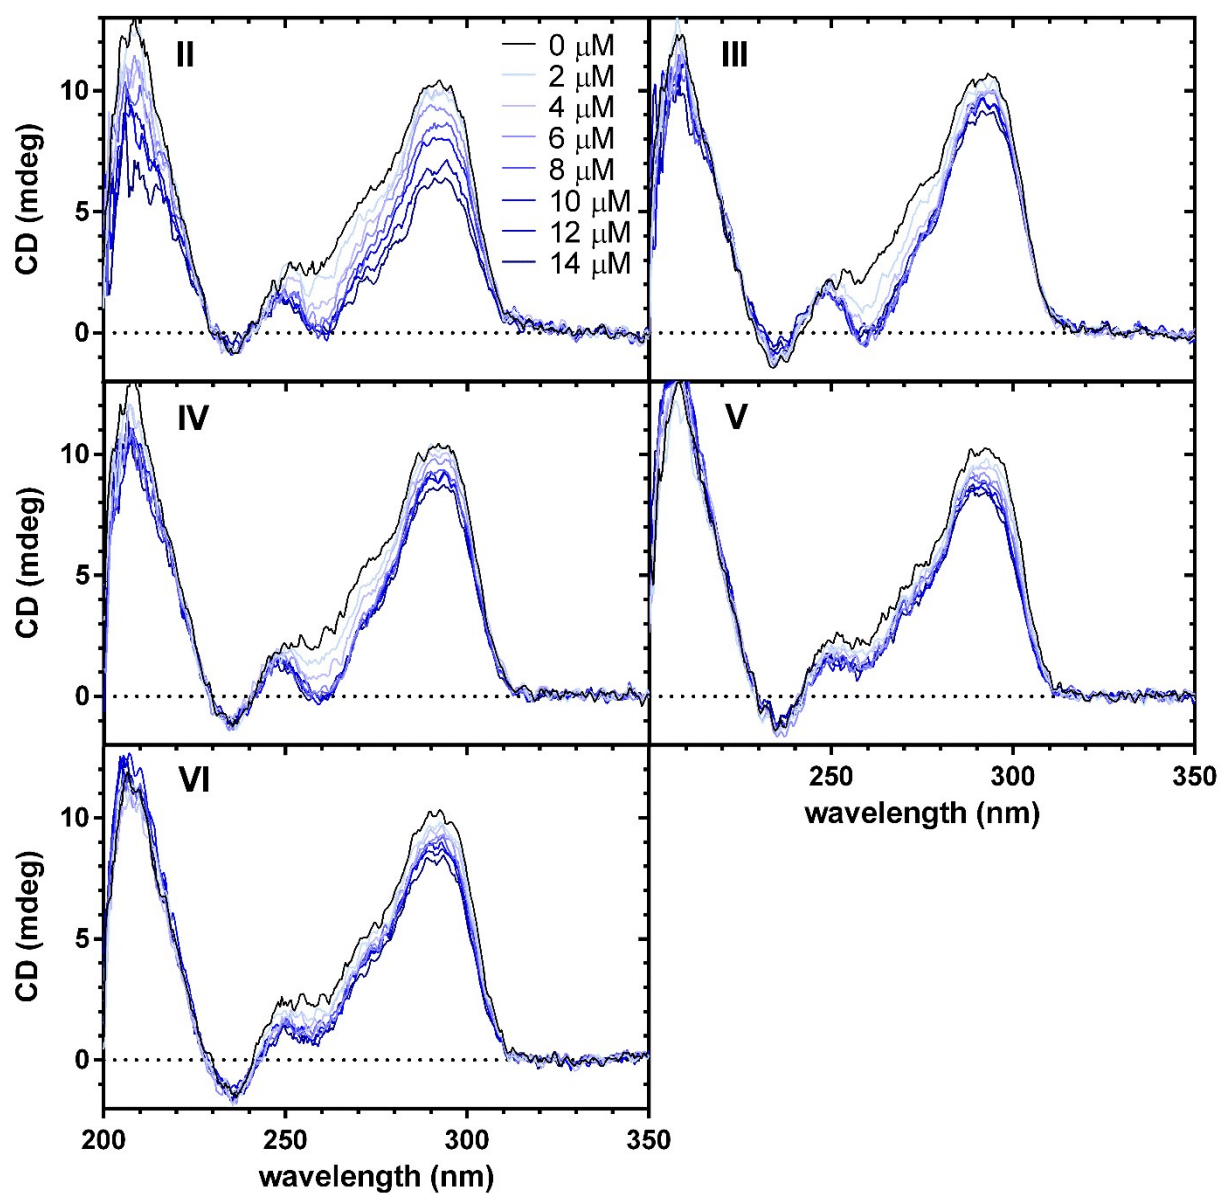

**Fig. S12.** CD spectra of 2.5  $\mu\text{M}$  *hTelo* G4 in the presence of increasing concentrations of **II-VI**. The concentrations of **II-VI** are indicated in the Fig. 4A. The buffer conditions were 10 mM potassium phosphate (pH 7) and 30 mM KCl.



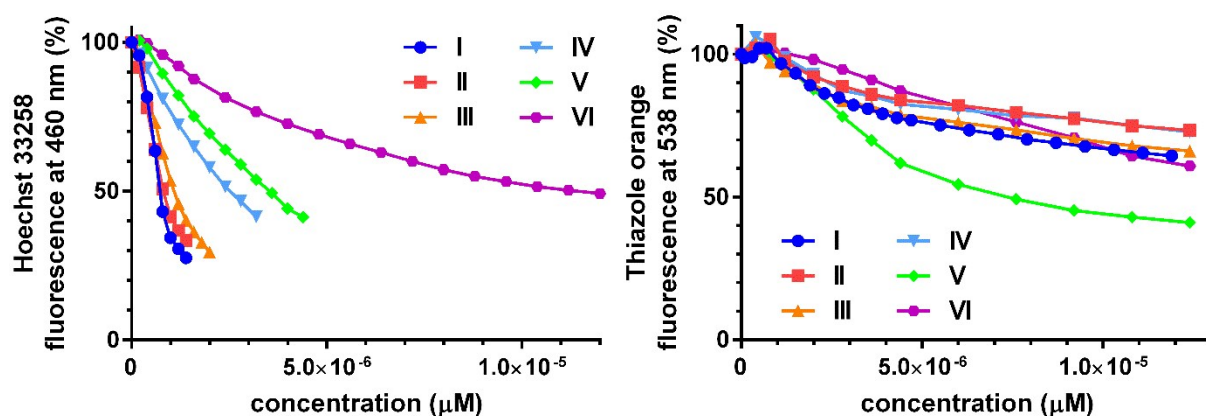

**Fig. S13.** Fluorescence response of the mixture of 0.25  $\mu\text{M}$  *c-myc* G4 and 0.25  $\mu\text{M}$  Hoechst 33258 (left panel), or TO (right panel) in the presence of increasing concentrations of **I-VI**. The buffer conditions were 10 mM potassium phosphate buffer (pH 7) and 30 mM KCl.

**Table S1.** Antiproliferative effects of the investigated SI-PPCs expressed as  $\text{IC}_{50}$  [ $\mu\text{M}$ ]<sup>[a]</sup> as determined with MTT assay after a 72 h treatment

|                               | MDA-231      | HCT116        |
|-------------------------------|--------------|---------------|
| Tetraplatin NC ( <b>I</b> )   | $7 \pm 1$    | $3.4 \pm 0.9$ |
| Triplatin NC ( <b>II</b> )    | $12 \pm 2$   | $5.9 \pm 0.9$ |
| Diplatin NC ( <b>IV</b> )     | $41 \pm 7$   | $20 \pm 4$    |
| Triplatin NC-A ( <b>III</b> ) | $60 \pm 10$  | $28 \pm 5$    |
| AH-59 ( <b>V</b> )            | $140 \pm 20$ | $69 \pm 4$    |
| AH-64 ( <b>VI</b> )           | $> 200$      | $170 \pm 20$  |

<sup>[a]</sup> The results are expressed as mean values  $\pm$  SD from three independent measurements.
